# Supplementary material for: Controlled formation of biosilica structures in vitroElectronic supplementary information (ESI) available: incorporation of silica-condensing peptide into the silica structure. See http://www.rsc.org/suppdata/cc/b2/b210635c/
Source: Royal Society of Chemistry journal article supplement (doi:10.1039/b210635c), 2002-12-11

## Supplemental Information

### Controlled Formation of Biosilica Structures *In Vitro*

Rajesh R. Naik,<sup>a</sup> Patrick W. Whitlock,<sup>ab</sup> Francisco Rodriguez,<sup>a</sup> Lawrence L. Brott,<sup>a</sup> Diana D. Glawe,<sup>a</sup> Stephen J. Clarson<sup>b</sup> and Morley O. Stone<sup>\*a</sup>

<sup>a</sup>Materials and Manufacturing Directorate, Air Force Research Laboratory, Wright-Patterson Air Force Base, Dayton, OH 45433, USA. <sup>b</sup>Department of Materials Science and Engineering, University of Cincinnati, Cincinnati, OH 45221, USA. <sup>c</sup>Department of Engineering Science, Trinity University, San Antonio, TX 78212, USA.

**Incorporation of silica-condensing peptide into the silica structure:** The silica precipitate obtained using the R5 peptide was collected by centrifugation from the reaction solution. The pellet fraction (P) was then washed several times with distilled water was resuspended in 1 M sodium hydroxide and incubated at 95°C for 10 min. The dissolved silica fraction (S) was then neutralized with 1M Tris-HCl pH 7.5. The fractions were analyzed by SDS-PAGE and Coomassie blue staining. The majority of the Si4-1 peptide is recovered in the pellet fraction suggesting that the peptide is closely associated with the silica structures.

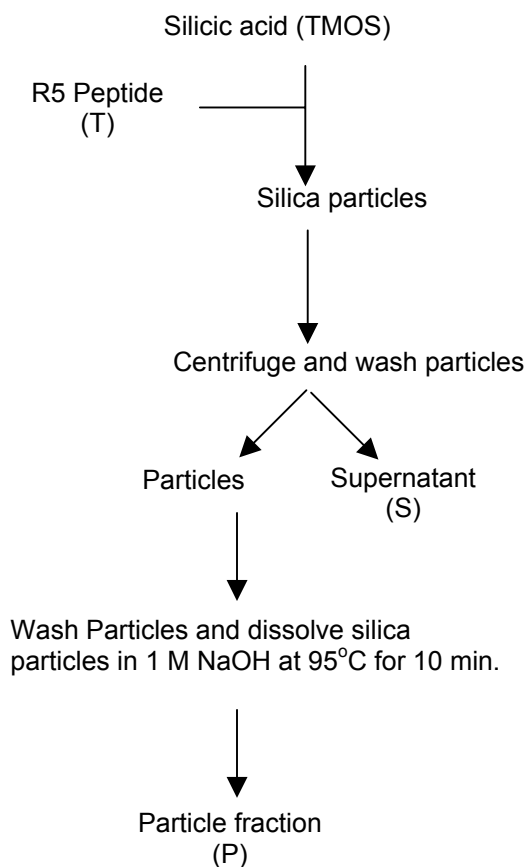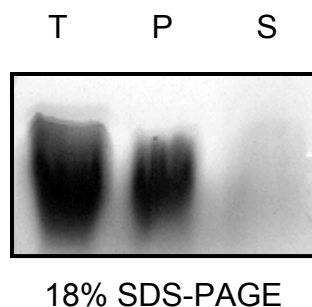

Supplement: b210635c.pdf [file b210635c.pdf]
